# Supplementary material for: A flexible computational pipeline for research analyses of unsolved clinical exome cases
Source: PubMed Central journal article supplement (PMC7730424; doi:10.1038/s41525-020-00161-w), 2020-12-10
Supplement: 41525_2020_161_MOESM1_ESM.pdf [file 41525_2020_161_MOESM1_ESM.pdf]

## ARTICLE

A flexible computational pipeline for research analyses of unsolved clinical exome cases

Timo Lassmann<sup>1,†</sup>, Richard W. Francis<sup>1,†</sup>, Alexia Weeks<sup>1</sup>, Dave Tang<sup>1</sup>, Sarra E. Jamieson<sup>1</sup>, Stephanie Broley<sup>2</sup>, Hugh J. S. Dawkins<sup>3</sup>, Lauren Dreyer<sup>2</sup>, Jack Goldblatt<sup>2</sup>, Tudor Groza<sup>1,2</sup>, Benjamin Kamien<sup>2</sup>, Cathy Kiraly-Borri<sup>2</sup>, Fiona McKenzie<sup>2,4</sup>, Lesley Murphy<sup>5</sup>, Nicholas Pachter<sup>2</sup>, Gargi Pathak<sup>2</sup>, Cathryn Poulton<sup>2</sup>, Amanda Samanke<sup>6</sup>, Rachel Skoss<sup>1</sup>, Jennie Slee<sup>2</sup>, Sharron Townshend<sup>2</sup>, Michelle Ward<sup>2</sup>, Gareth S. Baynam<sup>1,2,4,7</sup>, Jenefer M. Blackwell<sup>1</sup> † Equal contributions

<sup>1</sup>Telethon Kids Institute, University of Western Australia, Perth, WA, Australia; <sup>2</sup>Genetic Services of Western Australia, Department of Health, Government of Western Australia, Perth, WA, Australia; <sup>3</sup>Office of Population Health Genomics, Public Health Division, Department of Health, Government of Western Australia, Perth, WA, Australia; <sup>4</sup>Faculty of Health and Medical Sciences, Division of Pediatrics, University of Western Australia, Perth, WA, Australia; <sup>5</sup>Rare Voices Australia, Sydney, Australia; <sup>6</sup>GaRDN Genetics and Rare Diseases Network, WA, Australia; <sup>7</sup>Western Australian Register of Developmental Anomalies, Department of Health, Government of Western Australia, Perth, WA, Australia

Correspondence: [Timo Lassmann \(Timo.Lassmann@telethonkids.org.au\)](mailto:Timo.Lassmann@telethonkids.org.au) or Jenefer M. Blackwell ([Jenefer.Blackwell@telethonkids.org.au](mailto:Jenefer.Blackwell@telethonkids.org.au)); Telephone: +61 (8) 63191550

## SUPPLEMENTARY INFORMATION

### Legend to Supplementary Data 1.

**Supplementary Data 1.** Comparison of parameters influencing pipeline performance for prior compared to candidate and unresolved diagnoses. Bold highlights the previously diagnosed cases that failed in the pipeline. There were 3 prior diagnosis (ASPM, SLC26A4 and SARDH) that were for autosomal recessive disorders where the patient was diagnosed by the diagnostic laboratory as compound heterozygote (note: the second variant for ASPM did not filter through our pipeline). n/k = not known. Het = heterozygous; Hom = homozygous; Hem = male X-chr hemizygous. \*, \*\*, \*\*\*, \*\*\*\* indicate same variants in genes specified.

**Supplementary Table 1** Criteria used to assign pathogenicity criteria to variants following ACMG guidelines

| Code | Criteria for code assignment                                                                                                                 | Caution Code | Criteria for assigning caution code                                     |
|------|----------------------------------------------------------------------------------------------------------------------------------------------|--------------|-------------------------------------------------------------------------|
| pvs1 | null variant in a gene where LOF is a known mechanism of disease                                                                             | pvs1_caution | Is the variant in the last exon?                                        |
| ps1  | Same amino acid change as a previously established pathogenic variant regardless of nucleotide change                                        | ps1_caution  | If ps1 = 1, shows codon change                                          |
| pm1  | Located in a mutational hot spot and/or critical and well-established functional domain without benign variation                             | pm1_caution  | Always empty                                                            |
| pm2  | Absent from controls (or at extremely low frequency if recessive)                                                                            | pm2_caution  | Always empty                                                            |
| pm4  | Protein length changes as a result of in-frame deletions/insertions in a nonrepeat region or stop-loss variants                              | pm4_caution  | Always empty                                                            |
| pm5  | Novel missense change at an amino acid residue where a different missense change determined to be pathogenic has been seen before            | pm5_caution  | If pm5 = 1, shows known allele change                                   |
| pp2  | Missense variant in a gene that has a low rate of benign missense variation and in which missense variants are a common mechanism of disease | pp2_caution  | Shows connection errors if any                                          |
| pp3  | Multiple lines of computational evidence support a deleterious effect on the gene or gene product                                            | pp3_caution  | Shows number of computational tools (n=3) displaying significant scores |

## Supplementary Figure 1

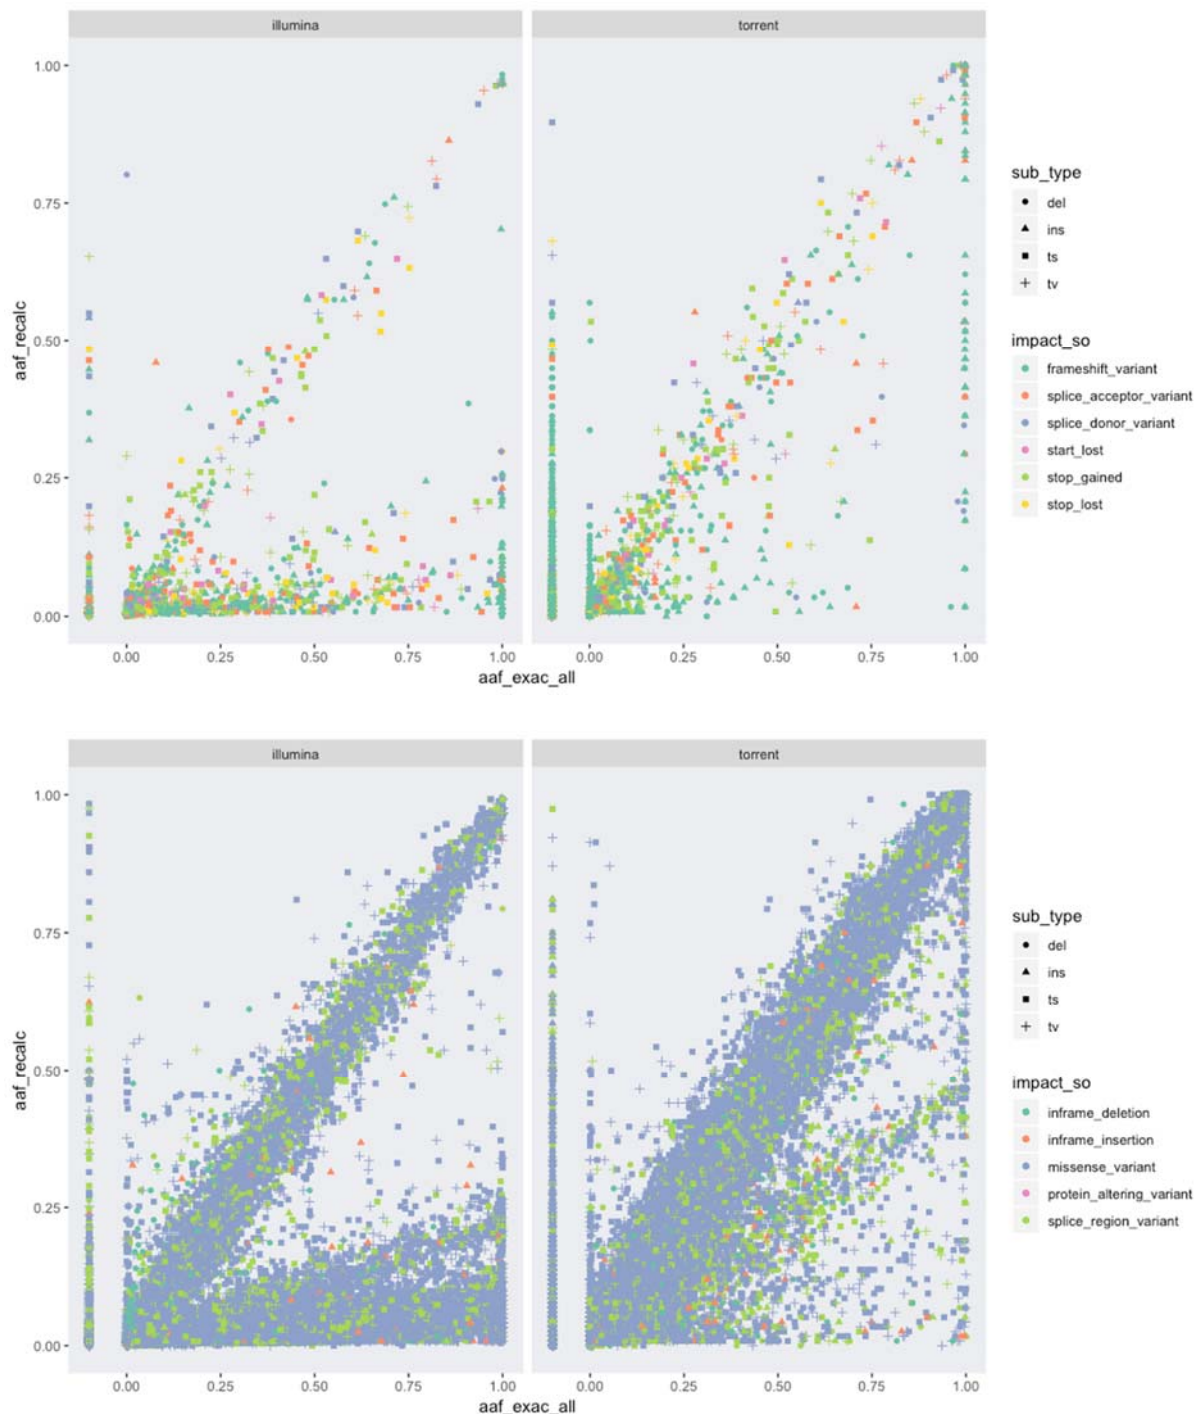

### Supplementary Figure 1 Variant annotations by sequencing technology.

Cohort allele frequencies (Y axes) by EXAC\_all (using the aaf\_exac\_all variable from GEMINI) frequencies for (a) HIGH impact and (b) MEDIUM impact variants called in Ion Torrent compared to Illumina TruSight™ sequencing. The tower of variants observed with allele frequency of zero, or an apparent allele frequency of one, in EXaC\_all (X-axis) compared to the study cohort (Y-axis) are false-positives consistent with systematic alignment errors particularly in Ion Torrent data. These error rates are higher for HIGH impact than MEDIUM impact missense variants.
